# Supplementary material for: Molecular basis of the scalp-ear-nipple syndrome unraveled by the characterization of disease-causing KCTD1 mutants
Source: PubMed Central journal article supplement (PMC6642198; doi:10.1038/s41598-019-46911-4), 2019-07-19
Supplement: 41598_2019_46911_MOESM1_ESM.pdf [file 41598_2019_46911_MOESM1_ESM.pdf]

## Supplementary Material

### **Molecular basis of the scalp-ear-nipple syndrome unraveled by the characterization of disease-causing KCTD1 mutants.**

Giovanni Smaldone<sup>a</sup>, Nicole Balasco<sup>b</sup>, Luciano Pirone<sup>b</sup>, Daniela Caruso<sup>b,c</sup>, Sonia Di Gaetano<sup>b</sup>, Emilia Maria Pedone<sup>b</sup>, and Luigi Vitagliano<sup>b,\*</sup>

<sup>a</sup>IRCCS SDN, Via Gianturco 113, 80143 Napoli, Italy

<sup>b</sup>Institute of Biostructures and Bioimaging, CNR, Via Mezzocannone 16, 80134 Napoli, Italy

<sup>c</sup>Università degli Studi della Campania "Luigi Vanvitelli", Viale Abramo Lincoln 5, 81100 Caserta, Italy

\*corresponding author: Luigi Vitagliano, [luigi.vitagliano@unina.it](mailto:luigi.vitagliano@unina.it), 0039 081 2534506

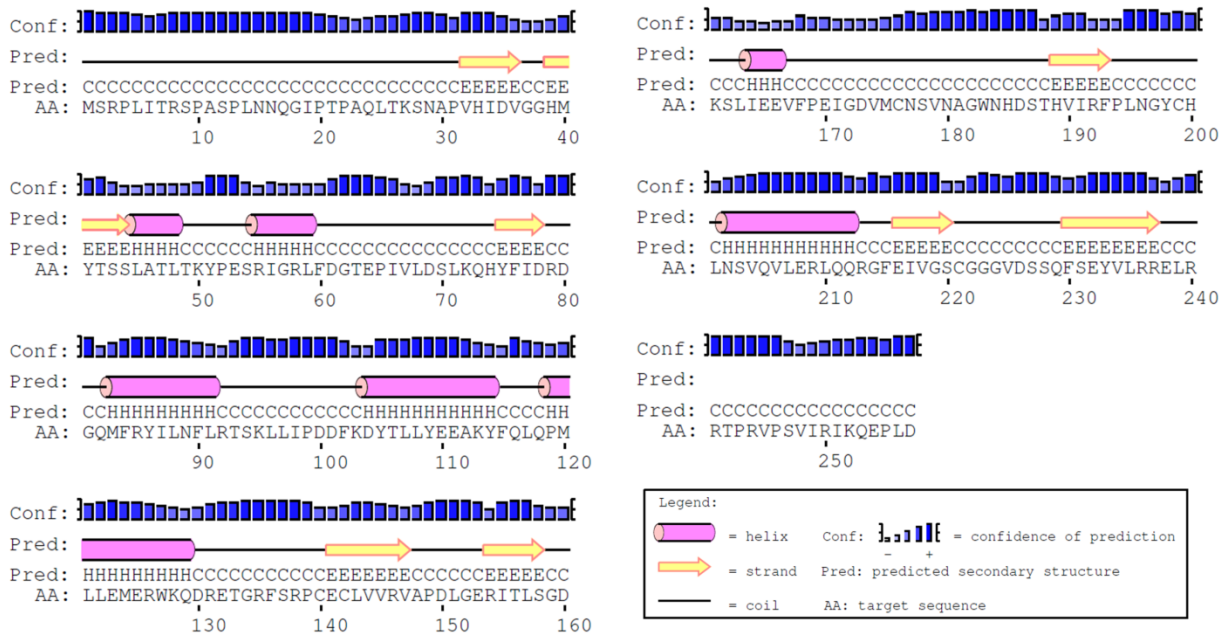

A

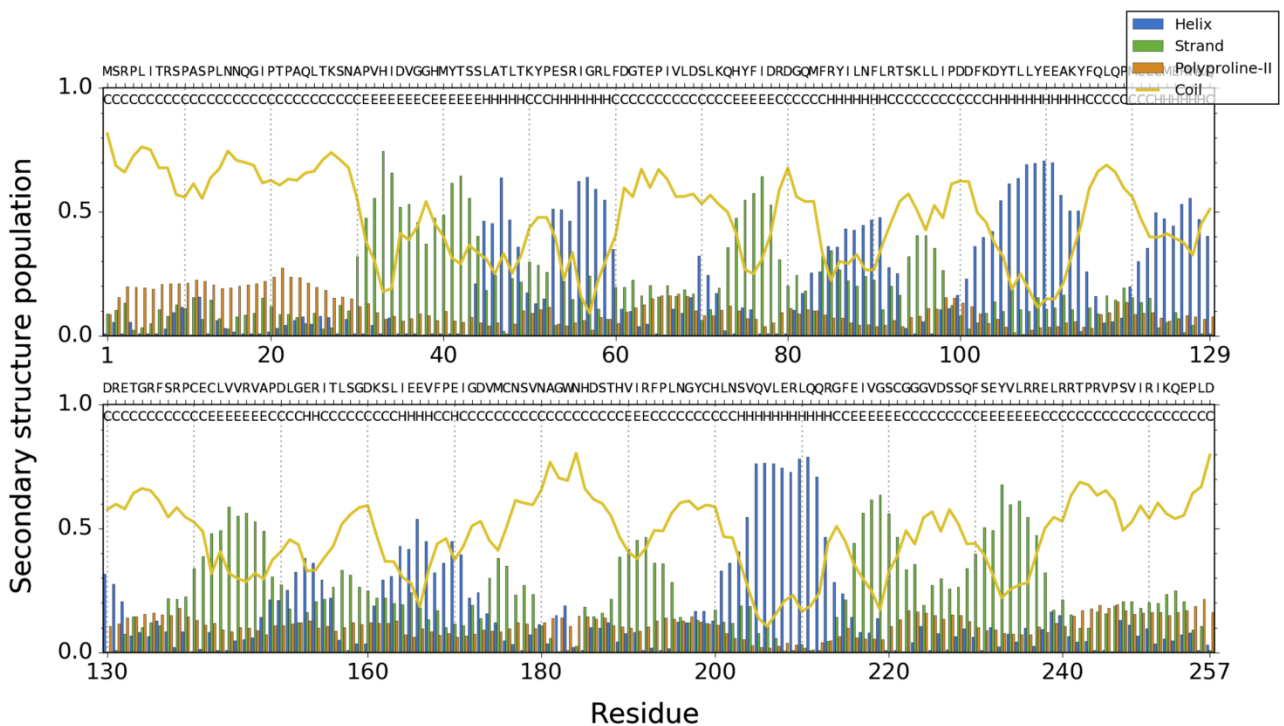

B

**Figure S1:** Secondary structure prediction of KCTD1 sequence computed by using Psipred server<sup>47</sup> (A) and Vendruscolo Lab. Software<sup>48</sup> (B).

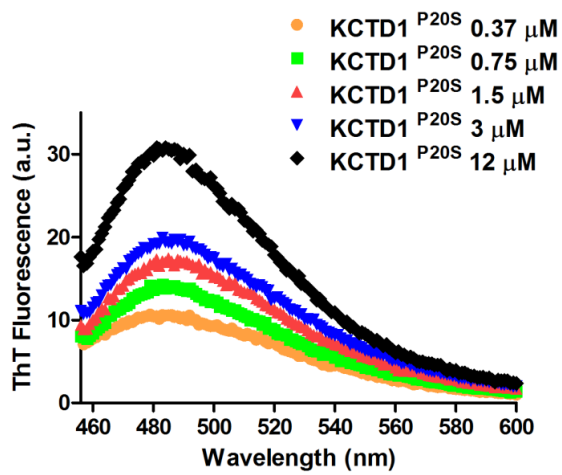

A

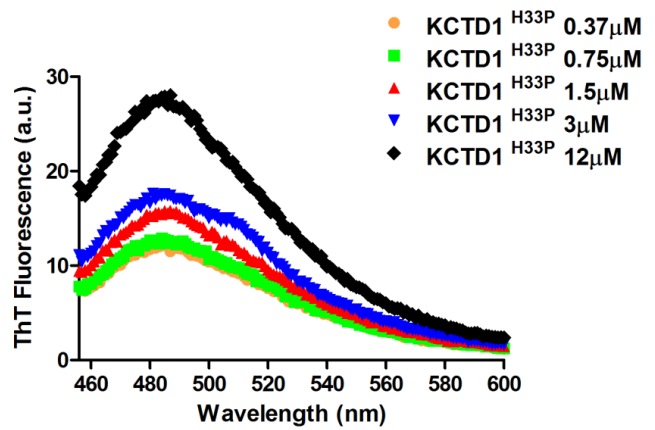

B

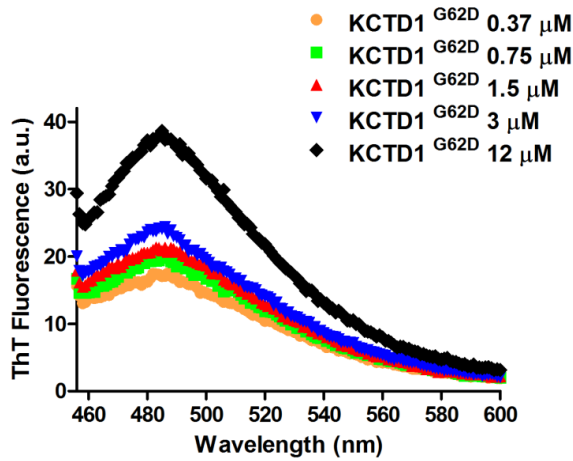

C

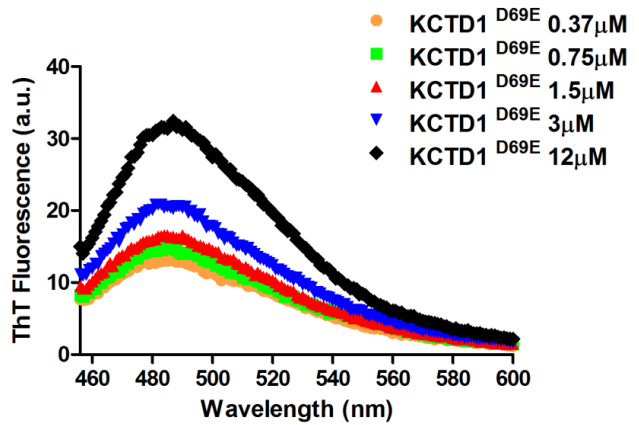

D

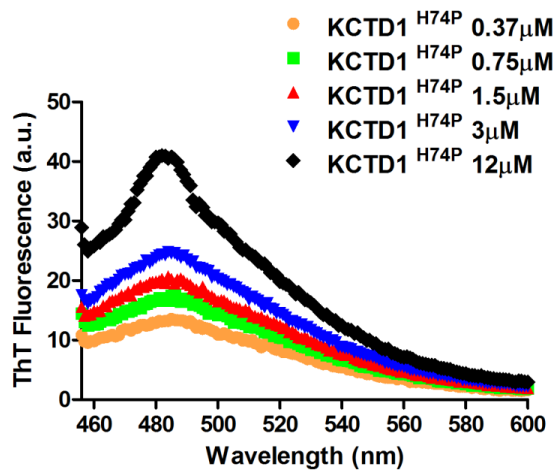

E

**Figure S2.** Thioflavin T Fluorescence assay: emission spectra obtained by adding a ThT solution (50  $\mu$ M) to KCTD1<sup>P20S</sup> (A), KCTD1<sup>H33P</sup> (B), KCTD1<sup>G62D</sup> (C), KCTD1<sup>D69E</sup> (D), and KCTD1<sup>H74P</sup> (E) at protein concentrations ranging from 0.37  $\mu$ M to 12  $\mu$ M.

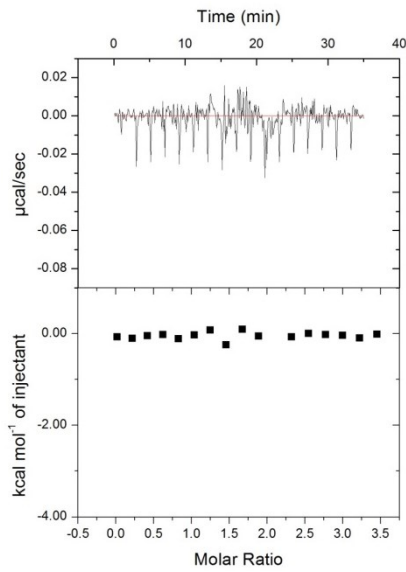

**A**

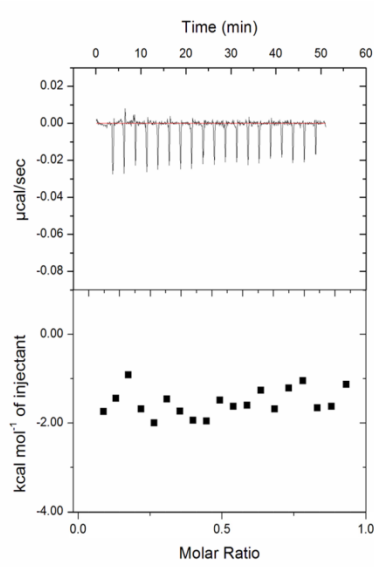

**B**

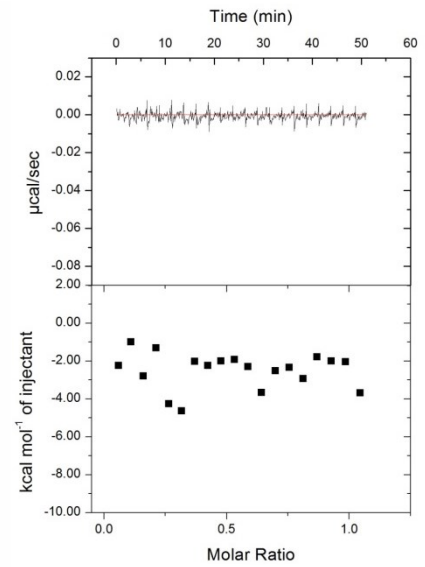

**C**

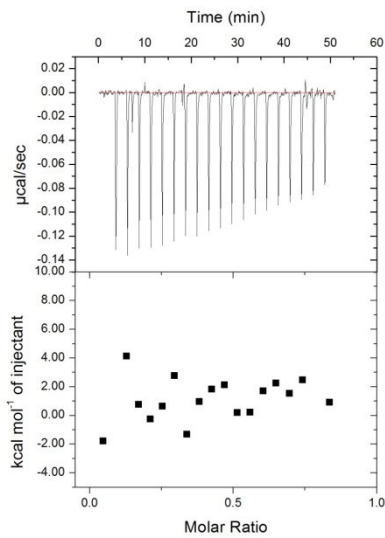

**D**

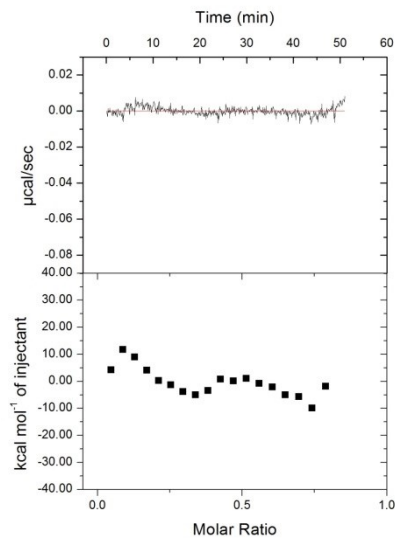

**E**

**Figure S3:** Evaluation of the binding of KCTD1 SEN related mutants KCTD1<sup>P20S</sup> (A), KCTD1<sup>H33P</sup> (B), KCTD1<sup>G62D</sup> (C), KCTD1<sup>D69E</sup> (D), KCTD1<sup>H74P</sup> (E) to AP-2 $\alpha$ <sup>NTD</sup> by Isothermal Titration Calorimetry. ITC experiments were performed by titrating KCTD1 variants (72  $\mu$ M-expressed as pentamer) into a solution of AP-2 $\alpha$ <sup>NTD</sup> (7  $\mu$ M). Top and bottom panels report raw and integrated data, respectively.

|   |         |                                                                                                                                                                                                                                                                                                                                                                                                                    |     |
|---|---------|--------------------------------------------------------------------------------------------------------------------------------------------------------------------------------------------------------------------------------------------------------------------------------------------------------------------------------------------------------------------------------------------------------------------|-----|
| A | KCTD1   | -----MSRFLITRSASFLNNQGITPAQLTKSNAE <b>VHIDVGGHMYTSS</b>                                                                                                                                                                                                                                                                                                                                                            | 44  |
|   | KCTD15  | -----MPHRKERESGSSSLHTGSGTAEAGNMSRSLSTRSEVSEFLAAQGITPAQLTKSNAE <b>VHIDVGGHMYTSS</b>                                                                                                                                                                                                                                                                                                                                 | 70  |
|   | KCTD19a | -----MEESGMAHESAEDLFPHNVGGWHFVSVP                                                                                                                                                                                                                                                                                                                                                                                  | 27  |
|   | KCTD4   | -----MERKINRREKEKEYEGKHNLEDTDQGNCKSTLMTLNVGGYLYITQ                                                                                                                                                                                                                                                                                                                                                                 | 47  |
|   | KCTD19b | -----IKVYVGS <del>SHWYATT</del>                                                                                                                                                                                                                                                                                                                                                                                    | 393 |
| B | KCTD6   | -----MDNGDWGYMMTDVTLNVGGHLYTTS                                                                                                                                                                                                                                                                                                                                                                                     | 26  |
|   | KCTD21  | -----MSDITLNVGGKLYTTS                                                                                                                                                                                                                                                                                                                                                                                              | 17  |
|   | KCTD11  | -----ISPPPVSESSPSPFGGVTLNVGGTLYSTT                                                                                                                                                                                                                                                                                                                                                                                 | 29  |
| C | KCTD10  | -----MEEMSGESVVSASVAAAATRTTSFKGTS <b>SSKVVKLVNNGGALYTTT</b>                                                                                                                                                                                                                                                                                                                                                        | 46  |
|   | TNFAIP1 | -----MSGDTCLCPASGAKPKLSGFKGGGLNKYVQLNVGGSLYTTT                                                                                                                                                                                                                                                                                                                                                                     | 42  |
|   | KCTD13  | -----MSAEASGFAAAAAE <b>SLEAPKESGLEPGPAAYGLKELTNSKYVVLNNGGSLHYTT</b>                                                                                                                                                                                                                                                                                                                                                | 55  |
|   | KCTD7   | -----MVVVTGREEDSRRQDGAMSSSDAEDDFLEATPTATQAGHALLELQEFEEVVPLNIGGAHFTTR                                                                                                                                                                                                                                                                                                                                               | 65  |
|   | KCTD14  | -----MWQCAVERE <b>VGRMTSQTLEQSPRRRTMSTVVELNVGGEFHTTT</b>                                                                                                                                                                                                                                                                                                                                                           | 47  |
| D | KCTD3   | -----MAGGHCGSFAAAAGSGEIVQLNVGGTRFSTS                                                                                                                                                                                                                                                                                                                                                                               | 32  |
|   | SHKBP1  | -----MAAATAAEGV <b>ESRGPGEVHILNVGGKRFSTT</b>                                                                                                                                                                                                                                                                                                                                                                       | 37  |
|   | KCTD9   | MRRVTLFLNGSE <b>KNGKVVAVYGTLSDLLSVASSKLGIKATSVYNGKGLIDDIALLRDDDLVFCVCEGEFFIDPQTDSEKPEGLLGFHTD<b>WTLNVGGGRYFTTT</b></b>                                                                                                                                                                                                                                                                                             | 104 |
| E | KCTD2   | -----MAELQLDEAMAGLGGGGSGVGDGGG <b>EVRGPESEPRAGETPRGHGRFAAAVAQPLEPCGPPERAGGGGAARWVRLNVGGTYFVTT</b>                                                                                                                                                                                                                                                                                                                  | 85  |
|   | KCTD5   | -----MAENHCELLSE <b>PARGGIGAGLGGGLCRRCSAGLGALAQREGSVSK<b>WVRLNVGGTYFLTT</b></b>                                                                                                                                                                                                                                                                                                                                    | 58  |
|   | KCTD17  | -----MQT <b>PREPAMRMEAGEAAPAGAGGRAAGGWGK<b>WVRLNVGGTVFLTT</b></b>                                                                                                                                                                                                                                                                                                                                                  | 45  |
|   | KCTD18  | -----MEGHKAEVEEVLVRLNVGGCIYAR                                                                                                                                                                                                                                                                                                                                                                                      | 26  |
| F | KCTD8   | -----MALKDTGSGGSTILP <b>ISEMVSSSSSPGASAAAA<b>PGCAESPF</b>EVVELNVGGQVYVTK</b>                                                                                                                                                                                                                                                                                                                                       | 58  |
|   | KCTD16  | -----MALSGNCSRY <b>PREQGSAVNSP<b>EVVELNVGGQVYFTR</b></b>                                                                                                                                                                                                                                                                                                                                                           | 39  |
|   | KCTD12  | -----MALADSTRGLE <b>NGGGGGGGSGSSSSSAEP<b>PLF</b>DIVELNVGGQVYVTR</b>                                                                                                                                                                                                                                                                                                                                                | 48  |
|   | KCNRG   | -----MSSQELVTLNVGGKIFTRR                                                                                                                                                                                                                                                                                                                                                                                           | 19  |
| A | KCTD1   | <b>LATLT</b> -KYPES <b>SRIGRLF</b> DGT----EPI <b>VLD</b> SLKQ-- <b>HYFI</b> DRDQ <b>MFRIYLNFLR</b> TSKLLIPDDFKDY <b>TLLYEAKYQLQPLM</b> LEMER <b>WKQDR</b> ----                                                                                                                                                                                                                                                     | 131 |
|   | KCTD15  | <b>LATLT</b> -KYPDSRIS <b>RFLNGT</b> ----EPIVLD <b>SLKQH</b> ---YFIDR <b>DGEIFRYVLSFLR</b> TSKLLLPDDFKDFSLLYE <b>EARYQLQPMVRELER</b> WQQEQ----                                                                                                                                                                                                                                                                     | 157 |
|   | KCTD19a | <b>RSKLS</b> -QFPDS----LL <b>WKE</b> -----ASALT <b>SSESQR</b> ---LFIDR <b>DGSTRFHVHYLYTSKLS</b> FSS-CAELNLL <b>YEQALGLQ</b> LMPLL <b>QTL</b> DLN <b>KEGK</b> H----                                                                                                                                                                                                                                                 | 110 |
|   | KCTD4   | <b>KQTLT</b> -KYPDT <b>FL</b> -EGIVNG----KIL <b>CFD</b> ADGH---YFIDR <b>DGLFRHVLNFLR</b> NGEL <b>LLPEGFRENQ</b> LLA <b>EQAEF</b> Q <b>LKGLAE</b> EVKS <b>RWEKE</b> ----                                                                                                                                                                                                                                            | 133 |
|   | KCTD19b | <b>LQTLT</b> -KYP----EL <b>LSNP</b> ----Q <b>RVYWI</b> TYG <b>QT</b> ---LLI <b>HGDQ</b> MF <b>RHILN</b> FL <b>R</b> L <b>LGK</b> FL <b>PSE</b> FK <b>EWPL</b> FC <b>QEV</b> EY <b>HI</b> PS <b>LSE</b> AL <b>AQ</b> CE <b>AYK</b> ----                                                                                                                                                                             | 492 |
| B | KCTD6   | <b>LTTLT</b> -RYPDS <b>MLGAM</b> FGG-----DF <b>PTAR</b> DP <b>Q</b> G--NYFIDR <b>DGFL</b> RY <b>VLN</b> FL <b>R</b> TSE <b>L</b> TP <b>LD</b> FD <b>KE</b> FD <b>LLR</b> KE <b>AD</b> FY <b>QIE</b> PL <b>I</b> Q <b>CL</b> ND <b>PK</b> PLY----                                                                                                                                                                   | 112 |
|   | KCTD21  | <b>LATLT</b> -SFPDS <b>MLGAM</b> FSG-----K <b>MPT</b> KRDS <b>Q</b> G--N <b>CFID</b> R <b>DGK</b> V <b>F</b> RY <b>ILN</b> FL <b>R</b> TS <b>H</b> LD <b>LP</b> ED <b>FQ</b> EM <b>GLLR</b> RE <b>AD</b> FY <b>Q</b> VP <b>LI</b> E <b>AL</b> Q <b>KE</b> VE <b>L</b> ----                                                                                                                                         | 103 |
|   | KCTD11  | <b>LETLT</b> -RFPDS <b>MLGAM</b> FRAG----T <b>PMP</b> PN <b>LS</b> Q <b>GG</b> GHY <b>FID</b> R <b>DG</b> K <b>A</b> FR <b>HLN</b> FL <b>R</b> L <b>GR</b> LD <b>L</b> PR <b>GY</b> GE <b>TAL</b> L <b>R</b> AE <b>AD</b> FY <b>Q</b> IR <b>PL</b> LD <b>AL</b> RE <b>LE</b> AS <b>Q</b> ----                                                                                                                      | 119 |
| C | KCTD10  | <b>MQTLT</b> -K-QD <b>TMLKAM</b> F <b>S</b> -----G <b>R</b> MEV <b>LT</b> D <b>SE</b> GV <b>ILID</b> R <b>CG</b> K <b>H</b> FG <b>TIL</b> NY <b>L</b> R <b>DG</b> AV <b>PL</b> PE <b>S</b> R <b>REI</b> E <b>ELLA</b> E <b>AKY</b> YL <b>VQ</b> GL <b>VEE</b> C <b>Q</b> AAL <b>Q</b> N <b>K</b> DTY--                                                                                                             | 134 |
|   | TNFAIP1 | <b>VRALT</b> -R-HD <b>TMLKAM</b> F-----S <b>G</b> RMEV <b>LT</b> D <b>KE</b> GW <b>ILID</b> R <b>CG</b> K <b>H</b> FG <b>TIL</b> NY <b>L</b> R <b>DD</b> TI <b>T</b> LP <b>Q</b> NR <b>Q</b> E <b>I</b> K <b>EL</b> MA <b>E</b> AKY <b>YL</b> I <b>Q</b> GL <b>V</b> N <b>M</b> C <b>S</b> AL <b>Q</b> D <b>K</b> K <b>D</b> S--                                                                                   | 130 |
|   | KCTD13  | <b>LRTL</b> T-G-QD <b>TMLKAM</b> F-----S <b>G</b> RVEV <b>LT</b> D <b>AG</b> GW <b>LI</b> DR <b>S</b> GR <b>H</b> FG <b>TIL</b> NY <b>L</b> R <b>DG</b> SV <b>LP</b> EST <b>REL</b> G <b>ELL</b> GE <b>ARY</b> YL <b>VQ</b> GL <b>I</b> ED <b>Q</b> L <b>AL</b> Q <b>Q</b> K <b>R</b> ETL-                                                                                                                         | 144 |
|   | KCTD7   | <b>LSTLR</b> -CYED <b>TMLA</b> AMF-----S <b>G</b> RHY <b>I</b> PT <b>D</b> SE <b>GR</b> Y <b>FID</b> R <b>DG</b> TF <b>H</b> GD <b>V</b> LN <b>FL</b> RS <b>GD</b> LP--R <b>ER</b> V <b>AV</b> Y <b>KEA</b> Q <b>Y</b> AI <b>G</b> PL <b>LE</b> Q <b>LEN</b> M <b>Q</b> PL <b>K</b> G----                                                                                                                          | 149 |
|   | KCTD14  | <b>LGTLR</b> -K <b>FP</b> GS <b>KLA</b> EMF-----S <b>S</b> LAK <b>AST</b> D <b>A</b> E <b>GR</b> FF <b>ID</b> RP <b>ST</b> Y <b>FR</b> PI <b>LD</b> Y <b>L</b> R <b>T</b> G <b>Q</b> VP---T <b>Q</b> HI <b>PE</b> VY <b>REA</b> Q <b>F</b> Y <b>E</b> IK <b>PL</b> V <b>K</b> LE <b>D</b> MP <b>Q</b> IF----                                                                                                       | 129 |
| D | KCTD3   | <b>RQTL</b> M-WIPDS <b>FF</b> SS <b>LL</b> -----S <b>G</b> R <b>I</b> ST <b>L</b> R <b>DE</b> T <b>GA</b> IF <b>ID</b> R <b>D</b> PA <b>AF</b> AP <b>IL</b> N <b>FL</b> R <b>T</b> KE <b>LD</b> L--R <b>G</b> V <b>S</b> I <b>N</b> V <b>L</b> R <b>H</b> E <b>A</b> E <b>F</b> Y <b>G</b> IT <b>PL</b> V <b>R</b> RL <b>LL</b> C <b>E</b> E <b>L</b> E <b>R</b> ----                                              | 117 |
|   | SHKBP1  | <b>RQTL</b> TW-IPDS <b>FF</b> SS <b>LL</b> -----S <b>G</b> R <b>I</b> ST <b>L</b> K <b>DE</b> T <b>GA</b> I <b>FID</b> R <b>D</b> PT <b>VF</b> AP <b>IL</b> N <b>FL</b> R <b>T</b> KE <b>LD</b> P--R <b>G</b> V <b>H</b> G <b>S</b> SS <b>LL</b> H <b>EA</b> Q <b>F</b> Y <b>GL</b> T <b>PL</b> V <b>R</b> RL <b>Q</b> L <b>R</b> E <b>E</b> L <b>D</b> R <b>S</b> C-                                              | 121 |
|   | KCTD9   | <b>RSTL</b> VN <b>KE</b> PD <b>SML</b> A <b>H</b> MF-KD----K <b>G</b> V <b>W</b> G <b>N</b> Q <b>D</b> H <b>R</b> GA <b>FLI</b> DR <b>S</b> PE <b>Y</b> F <b>EP</b> IL <b>NY</b> L <b>R</b> H <b>G</b> Q <b>L</b> I <b>V</b> N-D <b>G</b> I <b>N</b> LL <b>G</b> V <b>LE</b> E <b>AR</b> FF <b>G</b> D <b>S</b> L <b>E</b> H <b>LE</b> V <b>A</b> I <b>K</b> N <b>S</b> ----                                       | 106 |
| E | KCTD2   | <b>RQTL</b> G-REP <b>K</b> S <b>FL</b> CR <b>LCC</b> QE-----D <b>P</b> EL <b>D</b> SD <b>K</b> DE <b>T</b> GA <b>YLID</b> R <b>D</b> PT <b>Y</b> FG <b>PI</b> LN <b>Y</b> L <b>R</b> H <b>G</b> K <b>L</b> I <b>T</b> -K <b>E</b> L <b>A</b> E <b>E</b> GV <b>LE</b> E <b>A</b> E <b>F</b> Y <b>N</b> I <b>A</b> S <b>L</b> V <b>R</b> L <b>V</b> K <b>E</b> R <b>I</b> DN <b>EN</b> RT-                           | 177 |
|   | KCTD5   | <b>RQTL</b> C-RDP <b>K</b> S <b>FL</b> Y <b>R</b> LC-QA-----D <b>P</b> DL <b>D</b> SD <b>K</b> DE <b>T</b> GA <b>YLI</b> DR <b>D</b> PT <b>Y</b> FG <b>PI</b> LN <b>Y</b> L <b>R</b> H <b>G</b> K <b>L</b> V <b>I</b> N-K <b>D</b> L <b>A</b> E <b>E</b> GV <b>LE</b> E <b>A</b> E <b>F</b> Y <b>N</b> I <b>T</b> S <b>L</b> I <b>K</b> L <b>V</b> K <b>D</b> K <b>I</b> R <b>ER</b> D <b>S</b> K <b>T</b> S       | 151 |
|   | KCTD17  | <b>RQTL</b> C-REQ <b>K</b> S <b>FL</b> S <b>R</b> LC <b>Q</b> -----G <b>E</b> EL <b>Q</b> S <b>D</b> R <b>DE</b> T <b>GA</b> <b>YLI</b> DR <b>D</b> PT <b>Y</b> FG <b>PI</b> LN <b>Y</b> L <b>R</b> H <b>G</b> K <b>L</b> V <b>L</b> D-K <b>D</b> M <b>A</b> E <b>E</b> GV <b>LE</b> E <b>A</b> E <b>F</b> Y <b>N</b> I <b>G</b> PL <b>R</b> I <b>I</b> K <b>D</b> R <b>M</b> E <b>E</b> K <b>D</b> Y <b>T</b> V-  | 135 |
|   | KCTD18  | <b>RESL</b> C-R <b>F</b> K <b>D</b> S <b>ML</b> AS <b>M</b> FS <b>G</b> R-----F <b>P</b> LT <b>D</b> ES <b>G</b> AC <b>VID</b> R <b>D</b> GR <b>L</b> FK <b>Y</b> LL <b>D</b> Y <b>L</b> H <b>G</b> -E <b>V</b> Q <b>I</b> PT <b>D</b> E <b>Q</b> TR <b>I</b> AL <b>Q</b> E <b>E</b> A <b>D</b> Y <b>F</b> G <b>I</b> P <b>Y</b> P <b>S</b> Y <b>S</b> L <b>D</b> H <b>L</b> AN <b>E</b> M-----                    | 111 |
| F | KCTD8   | <b>HSTL</b> L-SVPDS <b>TL</b> AS <b>M</b> FS <b>P</b> SS <b>PR</b> GGARR <b>R</b> G <b>EL</b> PR <b>D</b> SR <b>AR</b> FF <b>ID</b> R <b>D</b> GF <b>L</b> FR <b>Y</b> LD <b>Y</b> L <b>R</b> D <b>K</b> Q <b>L</b> AL <b>P</b> EH <b>F</b> PE <b>K</b> ER <b>LL</b> RE <b>A</b> E <b>F</b> Y <b>Q</b> L <b>T</b> D <b>L</b> V <b>K</b> L <b>S</b> PK <b>V</b> T <b>R</b> Q----                                    | 153 |
|   | KCTD16  | <b>HSTL</b> I-S <b>I</b> PH <b>S</b> LL <b>W</b> K <b>M</b> F <b>S</b> PK--R <b>D</b> TAN---D <b>L</b> AK <b>D</b> SK <b>GR</b> <b>FFI</b> DR <b>D</b> GF <b>L</b> FR <b>Y</b> I <b>L</b> D <b>Y</b> L <b>R</b> D <b>R</b> Q <b>V</b> VP <b>D</b> HP <b>PE</b> <b>K</b> GR <b>L</b> K <b>R</b> E <b>A</b> E <b>F</b> Y <b>Q</b> L <b>P</b> D <b>L</b> V <b>K</b> L <b>L</b> T <b>P</b> D <b>E</b> IK <b>Q</b> ---- | 129 |
|   | KCTD12  | <b>RCTV</b> V-SVPDS <b>LL</b> WR <b>M</b> FT <b>Q</b> Q---Q <b>P</b> Q---E <b>L</b> AR <b>D</b> SK <b>GR</b> FF <b>L</b> DR <b>D</b> GF <b>L</b> FR <b>Y</b> I <b>L</b> D <b>Y</b> L <b>R</b> D <b>L</b> Q <b>V</b> LP <b>D</b> Y <b>F</b> P <b>E</b> RS <b>R</b> L <b>Q</b> RE <b>A</b> E <b>F</b> Y <b>EL</b> PE <b>L</b> V <b>R</b> RL <b>G</b> AP <b>Q</b> Q <b>P</b> G----                                    | 136 |
|   | KCNRG   | <b>FSTI</b> K-Q <b>F</b> PA <b>S</b> R <b>L</b> AR <b>L</b> MD <b>G</b> R---D <b>Q</b> ---E <b>F</b> K <b>M</b> V <b>G</b> -G <b>Q</b> I <b>F</b> V <b>D</b> R <b>D</b> GD <b>L</b> FS <b>F</b> IL <b>D</b> FL <b>R</b> TH <b>Q</b> LL <b>P</b> TE <b>F</b> S <b>D</b> Y <b>L</b> RL <b>Q</b> RE <b>A</b> L <b>F</b> Y <b>E</b> L <b>R</b> S <b>L</b> V <b>D</b> L <b>N</b> P <b>Y</b> LL <b>Q</b> PR----          | 106 |

**Figure S4:** Sequence alignment of members of the KCTD family grouped into the clades defined by Skoblov et al.<sup>24</sup>. The proline residues of the pre-BTB regions are highlighted in grey. Secondary structure elements of the KCTD proteins whose crystal structure has been reported are colored in blue ( $\alpha$ -helices) and red ( $\beta$ -sheets). KCTD20 and BTBD10 are not reported as they present a rather low sequence identity with the other members of the family.

**Table S1.** SEC data of KCTD1, KCTD1<sup>BTB</sup>, and KCTD1<sup>CTD</sup>.

| Protein              | Retention Volume (mL) | Calculated Molecular weight (kDa) | Theoretical Molecular weight of the monomer (kDa) | Ratio |
|----------------------|-----------------------|-----------------------------------|---------------------------------------------------|-------|
| KCTD1                | 12.5                  | 131.22                            | 29.46                                             | 4.5   |
| KCTD1 <sup>BTB</sup> | 14.6                  | 60.81                             | 13.20                                             | 4.6   |
| KCTD1 <sup>CTD</sup> | 14.5                  | 63.10                             | 14.04                                             | 4.5   |

**Table S2:** Percentages of sequence identity, computed on the BTB domain and on the pre-BTB portion, between human KCTD1 and its orthologs isolated from five species: 4 different classes of the Chordata phylum (*Gallus gallus*, *Danio rerio*, *Mouse*, *Alligator mississippiensis*) and 1 of the Nematoda phylum (*Caenorhabditis elegans*).

| KCTD1   | <i>Mouse</i> | <i>Caenorhabditis elegans</i> | <i>Danio rerio</i> | <i>Alligator mississippiensis</i> | <i>Gallus gallus</i> |
|---------|--------------|-------------------------------|--------------------|-----------------------------------|----------------------|
| BTB     | 100          | 95.0                          | 89.1               | 97.0                              | 97.0                 |
| Pre-BTB | 100          | 96.7                          | 61.3               | 100                               | 100                  |

**Table S3.** Oligonucleotides used for the preparation of KCTD1 proteins. NcoI and XhoI restriction site used for KCTD1<sup>CTD</sup> cloning are underlined.

| Protein               | Oligonucleotides                                                                                   |
|-----------------------|----------------------------------------------------------------------------------------------------|
| KCTD1 <sup>CTD</sup>  | Fw: CATGCC <u>ATGGG</u> ACCGGTCGTTTTAGCCGTC<br>Rev: CATG <u>CTCGAG</u> TTAATCCAGCGGTTCTTGTT        |
| KCTD1 <sup>P20S</sup> | Fw: CTGAATAATCAGGGTATTTTCGACACCGGCACAGCTGAC<br>Rev: GTCAGCTGTGCCGGTGTCGAAATACCCTGATTATTCAG         |
| KCTD1 <sup>H33P</sup> | Fw: CAAAAGCAATGCACCGGTTCTATTGATGTTGGTGGTCATATG<br>Rev: CATATGACCACCAACATCAATAGGAACCGGTGCATTGCTTTTG |
| KCTD1 <sup>G62D</sup> | Fw: GGTCGTCTGTTTGATGACACCGAACCGATTGTTCTG<br>Rev: CAGAACAATCGGTTCCGGTGTCATCAAACAGACGACC             |
| KCTD1 <sup>D69E</sup> | Fw: GAACCGATTGTTCTGGAAAGCCTGAAACAGCACTATTTTC<br>Rev: GAAATAGTGCTGTTTCAGGCTTTCCAGAACAATCGGTTTC      |
| KCTD1 <sup>H74P</sup> | Fw: CTGGATAGCCTGAAACAGCCCTATTTTCATTGATCGTGATG<br>Rev: CATCACGATCAATGAAATAGGGCTGTTTCAGGCTATCCAG     |
